# Supplementary material
Source: PubMed Central journal article supplement (PMC544506)
Supplement: plntcell_tpc.104.026013_1.pdf [file plntcell_tpc.104.026013_1.pdf]

| <b>Supplemental Table 2.</b> Primers used in this study |                                        |                     |
|---------------------------------------------------------|----------------------------------------|---------------------|
| <b>Name of primer</b>                                   | <b>Sequence, 5' – 3'</b>               | <b>Purpose</b>      |
| AP                                                      | GGCCACGCGTCGACTAGTACTTTTTTTTTTTTTTTTTT | 3'-RACE             |
| AUAP                                                    | GGCCACGCGTCGACTAGTAC                   | 3'-RACE and 5'-RACE |
| 11.3RACE1                                               | GACATCGATCAGAAGTTGCAGCCATTGCCA         | 3'-RACE             |
| 11.3RACE2                                               | GACATCGATGTCCAACATGTCAACCTGGT          | 3'-RACE             |
| 14.3RACE1                                               | GACATCGATGATGTGATTACTAAAGTTCCAG        | 3'-RACE             |
| 14.3RACE2                                               | GACATCGATGTTTGTGAGCGAAGCGCTTG          | 3'-RACE             |
| 19.3RACE1                                               | GACATCGATGGCTACGTCAAGAAAATCCAA         | 3'-RACE             |
| 19.3RACE2                                               | GACATCGATGCCACTTATGGCTGAAAAACT         | 3'-RACE             |
| 20.3RACE1                                               | GACATCGATTGGCATAACGTCAAGAAAATCC        | 3'-RACE             |
| 20.3RACE2                                               | CGCATCGATGTCAAGAAAATCCAATTTCAATG       | 3'-RACE             |
| 34.3RACE1                                               | GACATCGATAGCTCATGAGCAGATTATTGC         | 3'-RACE             |
| 34.3RACE2                                               | GACATCGATTTTCGCTCTCTGATTGAGGCG         | 3'-RACE             |
| 36.3RACE1                                               | GACATCGATGGAACAGCAATTCTAGTGTAAG        | 3'-RACE             |
| 36.3RACE2                                               | GACATCGATGCAAGTTGATTTTTGGTGAAGT        | 3'-RACE             |
| 44.3RACE1                                               | GACATCGATGCAGTATAACAAGAAGGAGATCTGC     | 3'-RACE             |
| 44.3RACE2                                               | CGCATCGATGAGATCTGCTCAAATATGACAC        | 3'-RACE             |
| 57.3RACE1                                               | GACATCGATGAAGATGGAAGCGAAGAAGAGAAG      | 3'-RACE             |
| 57.3RACE2                                               | GACATCGATACGAGCTGAAGGAAGCATTC          | 3'-RACE             |
| 76.3RACE1                                               | GACATCGATGACGTCATCGTCTTCCGTAT          | 3'-RACE             |
| 76.3RACE2                                               | GACATCGATGCCTGCATTTGACGTCACTG          | 3'-RACE             |
| 77.3RACE1                                               | GACATCGATGAAGCTAAGTCTATGGTTTCAC        | 3'-RACE             |
| 77.3RACE2                                               | GACATCGATGCAGGATTATGCCTAGGTGA          | 3'-RACE             |
| 101.3RACE1                                              | GACATCGATTTTGTAGCGCGTGGGACAAT          | 3'-RACE             |
| 101.3RACE2                                              | GACATCGATTACTAGCTGAGTATACCGAGT         | 3'-RACE             |
| 102.3RACE1                                              | GACATCGATGTACTATCATCGTCTCGGCAA         | 3'-RACE             |
| 102.3RACE2                                              | GACATCGATGGAAACGGAGTTATCTCCTCT         | 3'-RACE             |
| 126.3RACE1                                              | GACATCGATTACTGCTATGGCCTCCACTAC         | 3'-RACE             |

|             |                                   |         |
|-------------|-----------------------------------|---------|
| 126.3RACE2  | GACATCGATTTTCAGCTGCTGCTTCAATGCT   | 3'-RACE |
| 140.3RACE1  | GACATCGATTGGGGCCAAAGTTTTCCAGA     | 3'-RACE |
| 140.3RACE2  | GACATCGATAAGGGGAAGCTGAAAATAGTG    | 3'-RACE |
| 140.3RACE1B | GACATCGATTCGCGAGCATGTGAAATTGG     | 3'-RACE |
| 140.3RACE2B | GACATCGATGCTGAAAATAGTGAAAGAAGGAG  | 3'-RACE |
| 141.3RACE1  | GACATCGATACACAAGCAGTTACTGCAACT    | 3'-RACE |
| 141.3RACE2  | GACATCGATGGTTTCTGTGCAGATGTCTTC    | 3'-RACE |
| 141.3RACE1B | GACATCGATGCAACTGGTTTCTGTGCAGAT    | 3'-RACE |
| 141.3RACE2B | GACATCGATATCCAATCTATGCCATATGCTG   | 3'-RACE |
| 150.3RACE1  | GACATCGATCGAGTTGTGGAGGGATTGTCAC   | 3'-RACE |
| 150.3RACE2  | CGCATCGATACTCATCTTGTACTGGTGATCT   | 3'-RACE |
| 151.3RACE1  | GACATCGATTAGTCCTAGTGAAGGGACCA     | 3'-RACE |
| 151.3RACE2  | GACATCGATTTCGATGATGGCAGATGAGTG    | 3'-RACE |
| 189.3RACE1  | GACATCGATTCTTGGGTCTGCTGTTTGGGA    | 3'-RACE |
| 189.3RACE2  | GACATCGATGCGTATGAATGCTTTGCTTGA    | 3'-RACE |
| 197.3RACE1  | GACATCGATGCATGAAGCGAAGGTAAAACA    | 3'-RACE |
| 197.3RACE1B | GACATCGATGAAGCGAAGGTAAAACAGTAC    | 3'-RACE |
| 197.3RACE2  | GACATCGATACGAAAGAATGGGATGGAGCA    | 3'-RACE |
| 197.3RACE2B | GACATCGATTGGAGCAAAGTACTGACGTC     | 3'-RACE |
| 216.3RACE   | GACATCGATGGATATCGACGGAGCTAAAACCTG | 3'-RACE |
| 236.3RACE1  | GACATCGATCACCGGAGTATGCTATGCATGG   | 3'-RACE |
| 236.3RACE2  | GACATCGATACATCTATCGGTGAAGGCTGA    | 3'-RACE |
| 246.3RACE1  | GACATCGATACCTTGAGAAGCTCCCAGAAAGC  | 3'-RACE |
| 246.3RACE2  | GACATCGATGTTATCTTGGTTGGCCACGAT    | 3'-RACE |
| 256.3RACE1  | GACATCGATGGTAGCAACACATGGTTTCAAGC  | 3'-RACE |
| 256.3RACE2  | GACATCGATGGGTGCTTTCGGCATAGTTT     | 3'-RACE |
| 261.3RACE1  | GACATCGATATGACGGCGATCCGAGCTT      | 3'-RACE |
| 261.3RACE2  | GACATCGATGTGCGGTTAGCCACCCGTT      | 3'-RACE |
| 264.3RACE   | GACATCGATGCAGATTGGGCAAGACCTCAAC   | 3'-RACE |
| 271.3RACE1  | GACATCGATACCACGAGGGTTGTCATCTT     | 3'-RACE |

|                  |                                   |                           |
|------------------|-----------------------------------|---------------------------|
| 271.3RACE2       | GACATCGATTCATCCCATGCTCTTGCCTT     | 3'-RACE                   |
| 275.3RACE1       | GACATCGATGTTCTTCGTATCCCGAGTGAT    | 3'-RACE                   |
| 275.3RACE2       | CGCATCGATTCGTCCAAATGTGCTTACACTT   | 3'-RACE                   |
| 276.3RACE1       | GACATCGATATGGAGGGTGGGGATCCAT      | 3'-RACE                   |
| 276.3RACE2       | GACATCGATGTTTTGGAGCTGCTTCACCTA    | 3'-RACE                   |
| 284.3RACE        | GACATCGATCATGCTGTGTAACAGCACTG     | 3'-RACE                   |
| NUP-SALI         | CGCGTCGACAAGCAGTGGTAACAACGCAGAGT  | 5'-RACE                   |
| 126.5RACE1       | GCTGATTGAGAACTTGATGA              | 5'-RACE                   |
| 126.5RACE2       | GACATCGATGCATTGAAGCAGCAGCTGAAG    | 5'-RACE                   |
| 141.5RACE1B      | GACATCGATGACAGCATATGGCATAGATTGG   | 5'-RACE                   |
| 141.5RACE2B      | GACATCGATATCTGCACAGAAACCAGTTGC    | 5'-RACE                   |
| 189.5RACE1       | GACATCGATGCCTCTCCAAATGAATCTCAGC   | 5'-RACE                   |
| 189.5RACE2       | GACATCGATAACGCAACAACCTTCAAAGTCCTC | 5'-RACE                   |
| 216.5RACE1       | GACATCGATAACGGCAAATAACCGGCG       | 5'-RACE                   |
| 216.5RACE2       | GACATCGATGTACAGAATAATTCCACATGACC  | 5'-RACE                   |
| 264.5RACE1       | GACATCGATGCTGCTTTTTGTGCTCCTTC     | 5'-RACE                   |
| 264.5RACE2       | GACATCGATAACCTTCTAGCCTTGGATCC     | 5'-RACE                   |
| 275.5RACE1       | AAGTTGTGAGATCCAAGTGT              | 5'-RACE                   |
| 275.5RACE2       | GACATCGATATCACTCGGGATACGAAGAAC    | 5'-RACE                   |
| 275.5RACE3       | GACATCGATAAGTGTAAGCACATTTGGACG    | 5'-RACE                   |
| 276.5RACE1       | GACATCGATGCCACAGCATCTGGAGATGAAA   | 5'-RACE                   |
| 276.5RACE2       | GACATCGATGCCCCAGCCTCAGCTATGTAAG   | 5'-RACE                   |
| 284.5RACE1       | TTCTCGTCCTTCCCTTGAAG              | 5'-RACE                   |
| 284.5RACE2       | GACATCGATTCCGAAGTCAGTGTTTCAGCAA   | 5'-RACE                   |
| Cla1-SK          | CACATCGATTCTAGAAGTACTGGATC        | subcloning into pgR106    |
| M13(-20)         | GTAAAACGACGGCCAGT                 | subcloning into pgR106    |
| 132P4ClaI        | CACATCGATGAATCTTCATTGATCATATCT    | subcloning into pgR106    |
| T3               | AATTAACCCTCACTAAAGGG              | subcloning into pgR106    |
| sulphurLeACIKfwd | AACATTGAGAACTCGAGAGGATGGTAATG     | subcloning into pTRV-RNA2 |
| LeACIK-flrev     | TGCCATTGATCAATAAGAATTTAGTTT       | subcloning into pTRV-RNA2 |

|                  |                                   |                                          |
|------------------|-----------------------------------|------------------------------------------|
| SulphurCF9Fwd    | AACATTGAGAAACTCTCTCGTGGGTTACGG    | subcloning into pTRV-RNA2                |
| Cf9-G3a          | CGCGGATCCTACTACTAATATCTTTTCTTGTGC | subcloning into pTRV-RNA2                |
| SulphurNtACIKFwd | AACATTGAGAAACTCTCAAGAAAGAAAATAG   | subcloning into pTRV-RNA2                |
| NtACIK-STOP-Bgl  | AGAAGATCTAGCTCTATGGAAATCATTGCG    | subcloning into pTRV-RNA2<br>and pMALc2X |
| 264RNAi3'FseI    | ATAGGCCGGCCGAGTTTCTTGTGTAGAGCCT   | subcloning into 'hairpin' construct      |
| 264RNAi5'XhoI    | AGACTCGAGGACTGGTCATTTGACTGCAGCA   | subcloning into 'hairpin' construct      |
| 264RNAi3'AscI    | ATAGGCGCGCCCGAGTTTCTTGTGTAGAGCCT  | subcloning into 'hairpin' construct      |
| 264RNAi5'XbaI    | GCGTCTAGAGACTGGTCATTTGACTGCAGCA   | subcloning into 'hairpin' construct      |
| NtACIK-ATG-Bgl   | AGAAGATCTATGAAGATTACATGGGAATCT    | subcloning into pMALc2X                  |
| LeACIK-ATG-SalI  | AATTGTGACATGGCTACTTGCAGGAATTG     | subcloning into pMALc2X                  |
| LeACIK-STOP-PstI | AATTCTGCAGTCAATAAGAATTTAGTTTG     | subcloning into pMALc2X                  |
| NtACIK-ATG-ClaI  | AGAATCGATATGAAGATTACATGGGAATCT    | RT-PCR                                   |
| NtACIK1-mutDRev  | GAAGCCTTAAAAGCACGATATATG          | RT-PCR                                   |
| LeACIK1-flfwd    | AGTATAACAGCTATGGCTACTGCGGA        | RT-PCR                                   |
| LeACIK1-RTPCRrev | CCAAATCAAGCAATTTAACAG             | RT-PCR                                   |
| Cf9-16s          | CCAGAAGAACCTACAATTA               | RT-PCR                                   |
| Cf9-18a          | AATGCGAAAGGTATTCGTTCC             | RT-PCR                                   |
| AC1              | ATGGCAGACGGTGAGGATATTCA           | RT-PCR                                   |
| AC2              | GCCTTTGCAATCCACATCTGTTG           | RT-PCR                                   |
